# Supplementary material for: Aged bone marrow macrophages drive systemic aging and age-related dysfunction via extracellular vesicle-mediated induction of paracrine senescence
Source: PubMed Central journal article supplement — Nat Aging. 2024 Sep 12;4(11):1562–81. doi: 10.1038/s43587-024-00694-0 (PMC11564114; doi:10.1038/s43587-024-00694-0), 2024-09-12
Supplement: 43587_2024_694_MOESM1_ESM.pdf [file 43587_2024_694_MOESM1_ESM.pdf]

---

# **Aged bone marrow macrophages drive systemic aging and age-related dysfunction via extracellular vesicle-mediated induction of paracrine senescence**

---

In the format provided by the authors and unedited

---

## **Supplementary Information**

### **Supplementary Figures 1-2**

### **Tables S1-S6**

**Tables S1.** Baseline characteristics according to initiation of either fenofibrate or simvastatin among patients with pre-diabetes

**Tables S2-S5.** Baseline characteristics according to initiation of either fenofibrate or simvastatin among patients with pre-diabetes and diabetes

**Tables S6.** Key Resources Table

# Supplementary Figure 1

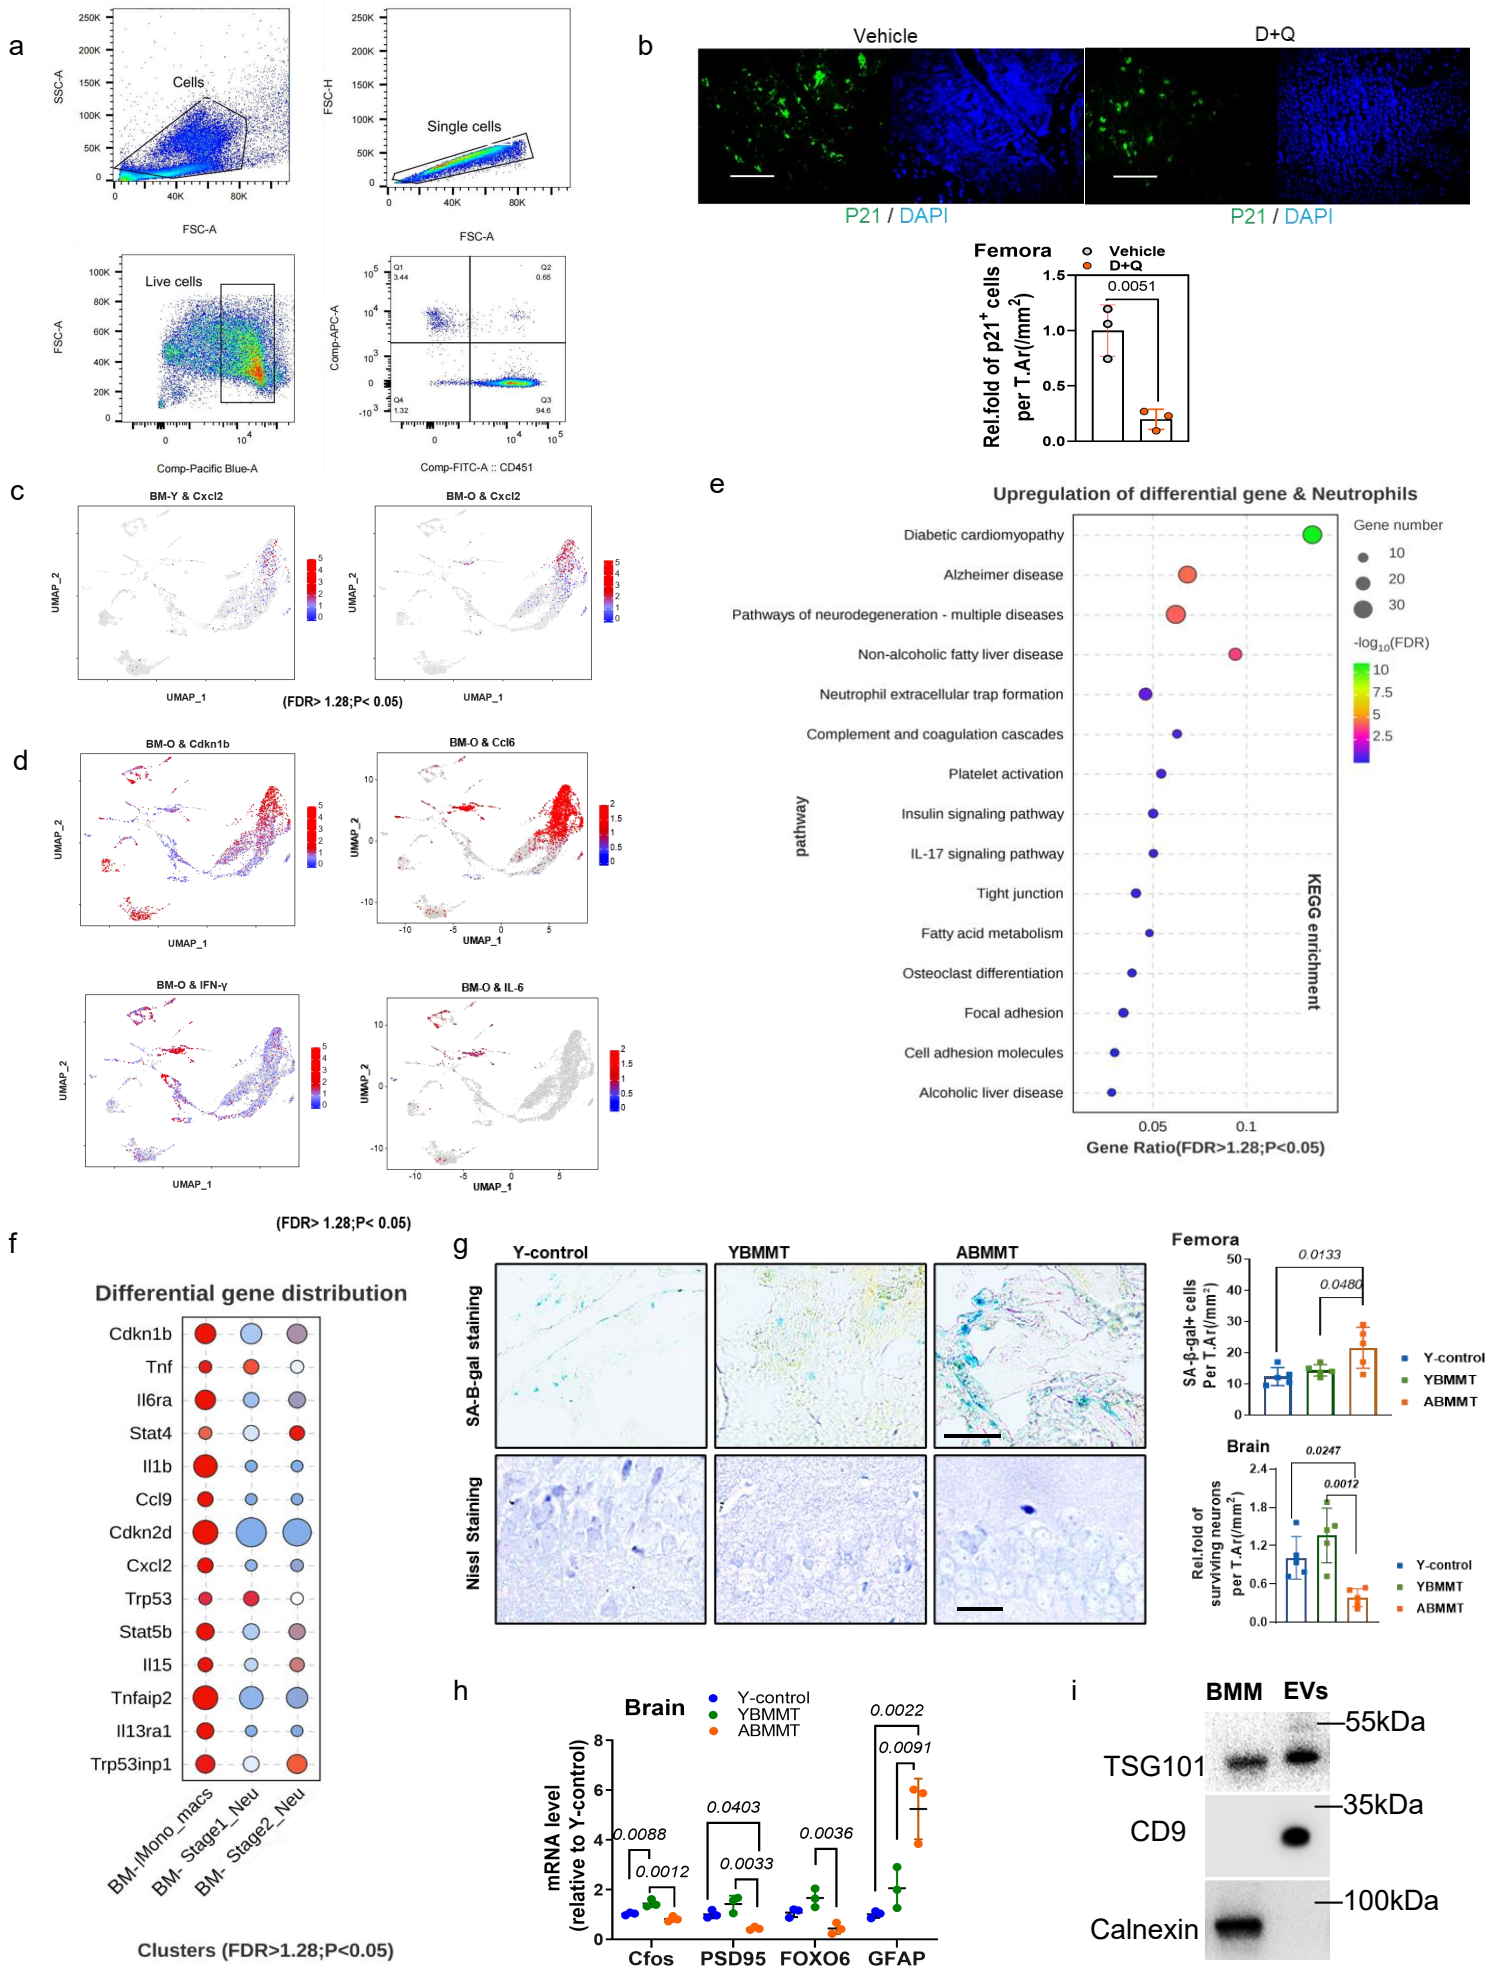

## Supplementary Figures Legends

**Supplementary Figure 1 Senescent BMMs cause senescence propagation to young mice.** **a**, The gating figure of flow cytometry. **b**, Immunofluorescence staining of p21 in femoral bone sections (scale bar, 250 $\mu$ m;  $n=3$  mice; 5~6 images per mouse). **c**, UMAP plots show the distribution of senescence-related genes in different cell types in young and old bone marrow (BM-Y, BM-O). **d**, UMAP plots show the expression and distribution of senescence-related genes in old bone marrow cells (BM-O). **e**, Bubble plot shows the KEGG enrichment pathways for the upregulated aging-related genes in neutrophils. **f**, Aging-related differential gene distribution in BMMs and neutrophils. **g**, Representative images of SA- $\beta$ -gal staining in femur and Nissl staining in brain (scale bar, 250 $\mu$ m;  $n=5$  mice; 5~6 images per mouse). **h**, The mRNA levels of C-fos, Psd95, Foxo6 and Gfap in the brain ( $n=3$  mice). **i**, Western blot analysis of EV-related markers ( $n=3$  mice).

Data are shown as mean  $\pm$  SEM. \* $P < 0.05$ ; \*\* $P < 0.01$  were determined using two-tailed  $t$ -test and one-way ANOVA followed by Tukey's multiple comparison test.

a

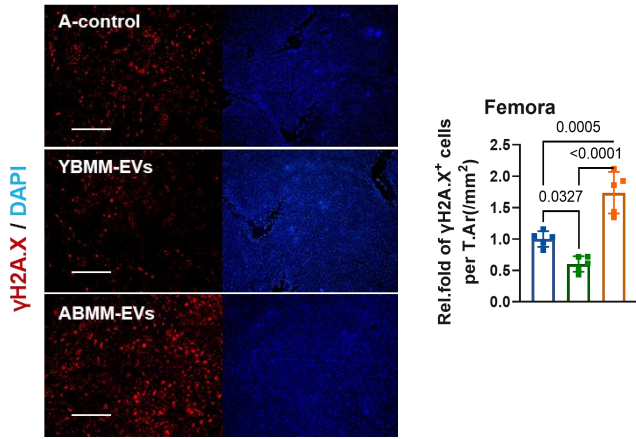

b

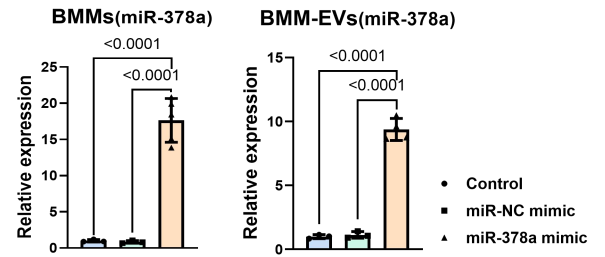

c

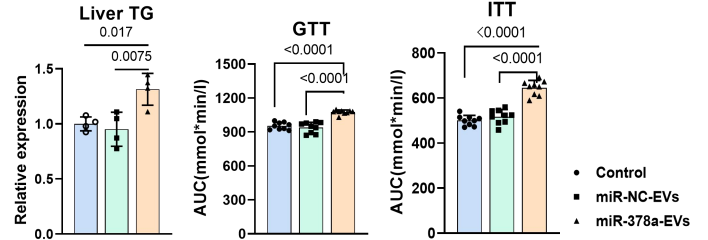

d

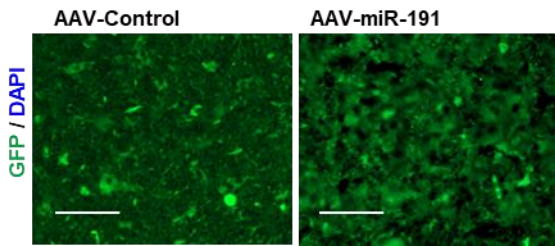

e

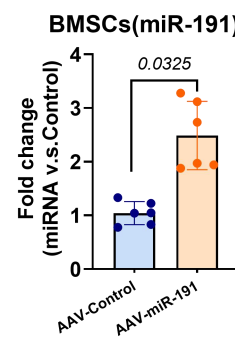

f

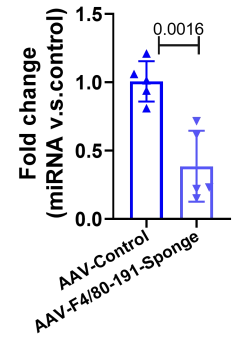

g

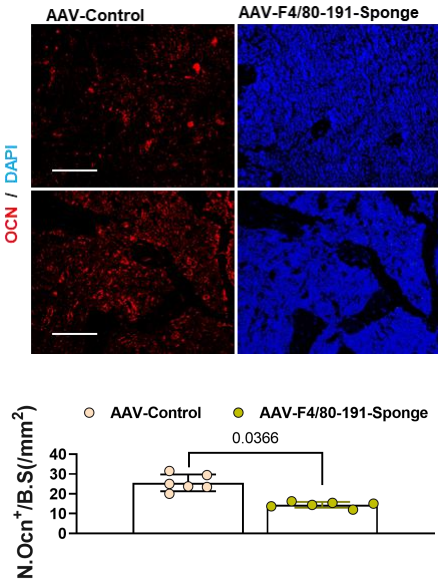

h

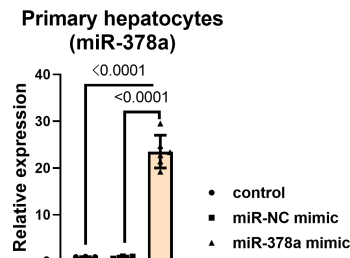

i

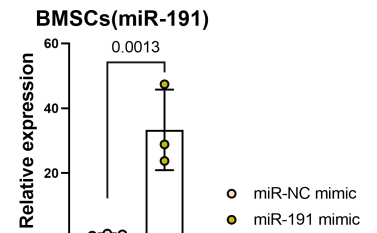

j

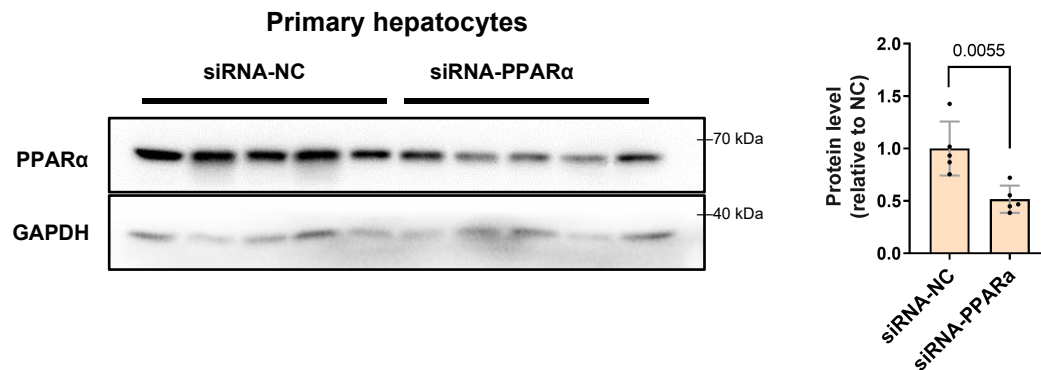

**Supplementary Figure 2 The effects of miR-378a and miR-191 on systemic aging *in vivo*.**

**a**, Immunofluorescence detection of  $\gamma$ H2A.X in femur of aged mice after treatment with YBMM-EVs or ABMM-EVs (scale bar, 250 $\mu$ m;  $n=5$  mice; 5~6 images per mouse). **b**, Expression levels of miR-378a in macrophage and macrophage-derived EVs after miR-378a mimic transfection ( $n=4$  biological replicates). **c**, The hepatic triglyceride (TG) levels were measured in young recipients transplanted with macrophage-miR-378a-EVs ( $n=4$  mice), and the AUC data of GTT and ITT ( $n=9$  mice). **d-e**, The expression levels miR-191 in BMSCs of aged mice (22m, male mice) injected with AAV-miR-191 (scale bar, 250 $\mu$ m;  $n=6$  mice). **f**, The expression levels miR-191 in BMMs of young mice (2m, male mice) injected with AAV-F4/80-miR-191-sponge ( $n=5$  mice). **g**, Representative images of OCN immunofluorescence in femurs (scale bar, 250 $\mu$ m;  $n=6$  mice; 5~6 images per mouse). **h**, Expression level of miR-378a in primary hepatocytes after miR-378a mimic transfection ( $n=6$  biological replicates for miR-378a mimic;  $n=3$  biological replicates for other groups). **i**, Expression level of miR-191 in BMSCs after miR-191 mimic transfection ( $n=3$  biological replicates). **j**, Protein levels of PPAR $\alpha$  in primary hepatocytes after siRNA-PPAR $\alpha$  transfection ( $n=5$  biological replicates).

Data are shown as mean  $\pm$  SEM. \* $P < 0.05$ ; \*\* $P < 0.01$ ; \*\*\* $P < 0.001$ ; # $P < 0.0001$  were determined using two-tailed  $t$ -test in **f-g** and **j**, two-tailed  $t$ -test with a Welch's correction in **e** and **i**, and one-way ANOVA followed by Tukey's multiple comparison test in **a-c**, and **h**.

**Table S1. Baseline characteristics according to initiation of either fenofibrate or simvastatin among patients with pre-diabetes**

| Variable list                                    | Fenofibrate<br>(n=1,602) | Simvastatin<br>(n=6,384) | Standard<br>difference |
|--------------------------------------------------|--------------------------|--------------------------|------------------------|
| <b>Demographics</b>                              |                          |                          |                        |
| Age, mean (SD), y                                | 63.5 (10.0)              | 63.0 (9.8)               | 0.049                  |
| Socioeconomic deprivation index score, mean (SD) | 2.3 (1.6)                | 2.3 (1.6)                | 0.003                  |
| Women (%)                                        | 40.8                     | 41.1                     | 0.005                  |
| <b>BMI, mean (SD), kg/m<sup>2</sup></b>          | 29.6 (5.0)               | 29.5 (5.3)               | 0.006                  |
| <b>Lifestyle factors</b>                         |                          |                          |                        |
| Drinking (%)                                     |                          |                          | 0.036                  |
| None                                             | 16.6                     | 16.8                     |                        |
| Past                                             | 3.2                      | 3.3                      |                        |
| Current                                          | 75.5                     | 74.5                     |                        |
| Missing data                                     | 4.7                      | 5.4                      |                        |
| Smoking (%)                                      |                          |                          | 0.037                  |
| None                                             | 42.8                     | 42.7                     |                        |
| Past                                             | 37.9                     | 36.6                     |                        |
| Current                                          | 19.0                     | 20.4                     |                        |
| Missing data                                     | 0.3                      | 0.3                      |                        |
| <b>Comorbidity (%)</b>                           |                          |                          |                        |
| Hypercholesteremia*                              | 73.7                     | 74.2                     | 0.011                  |
| Hypertriglyceridemia*                            | 56.6                     | 54.7                     | 0.038                  |
| Hypertension                                     | 62.5                     | 61.4                     | 0.025                  |
| Transient ischemic attack                        | 4.4                      | 4.3                      | 0.005                  |
| Ischemic heart disease                           | 24.4                     | 22.7                     | 0.041                  |
| Myocardial infarction                            | 9.9                      | 9.6                      | 0.007                  |
| Stroke                                           | 4.1                      | 4.3                      | 0.009                  |
| Osteoarthritis                                   | 25.4                     | 22.5                     | 0.068                  |
| Chronic kidney disease                           | 9.9                      | 9.5                      | 0.013                  |
| Depression                                       | 16.6                     | 14.7                     | 0.051                  |
| Varicose veins                                   | 7.7                      | 6.9                      | 0.032                  |
| Venous thromboembolism                           | 3.5                      | 3.2                      | 0.015                  |
| Chronic obstructive pulmonary disease            | 5.5                      | 4.3                      | 0.057                  |
| Pneumonia or infection                           | 8.1                      | 6.9                      | 0.048                  |
| Osteoporosis                                     | 4.2                      | 3.8                      | 0.021                  |
| Fall                                             | 9.5                      | 8.8                      | 0.025                  |
| Cancer                                           | 9.3                      | 10.1                     | 0.028                  |
| <b>Medication‡ (%)</b>                           |                          |                          |                        |
| Nonsteroidal anti-inflammatory drugs             | 39.3                     | 37.1                     | 0.044                  |
| Opioids                                          | 14.9                     | 13.1                     | 0.050                  |
| Other statins                                    | 34.6                     | 32.7                     | 0.039                  |
| Corticosteroid                                   | 23.2                     | 21.1                     | 0.051                  |
| Thiazide diuretics                               | 22.3                     | 22.4                     | 0.002                  |
| Antihypertensive                                 | 70.7                     | 70.0                     | 0.016                  |
| Antidiabetic                                     | 1.1                      | 1.6                      | 0.046                  |

|                                          |           |           |       |
|------------------------------------------|-----------|-----------|-------|
| Anticoagulants                           | 4.4       | 4.2       | 0.009 |
| Aspirin                                  | 32.3      | 31.5      | 0.018 |
| Antidepressant                           | 16.8      | 16.3      | 0.012 |
| Proton pump inhibitors                   | 38.8      | 35.3      | 0.073 |
| Benzodiazepine                           | 13.9      | 13.0      | 0.026 |
| Warfarin                                 | 4.2       | 3.9       | 0.012 |
| Antiosteoporosis drugs                   | 7.2       | 6.5       | 0.031 |
| Nitrates                                 | 9.8       | 9.3       | 0.017 |
| Bisphosphonates                          | 3.3       | 2.8       | 0.028 |
| <b>Healthcare utilization, mean (SD)</b> |           |           |       |
| Hospitalizations‡                        | 0.4 (1.0) | 0.4 (1.0) | 0.036 |
| General practice visits‡                 | 6.3 (5.4) | 6.0 (6.0) | 0.062 |
| Specialist referrals‡                    | 0.7 (1.1) | 0.7 (1.2) | 0.021 |

†The Socio-Economic Deprivation Index was measured by the Townsend Deprivation Index, which was grouped into quintiles from 1 (least deprived) to 5 (most deprived).

‡Frequency during the past 1 year.

\*Hypercholesteremia was defined as a total cholesterol level above 5.0 mmol/L; hypertriglyceridemia was defined as a non-fasting triglyceride level above 2.3 mmol/L.

BMI, body mass index; n, number; y, years; SD, standard deviation.



**Table S2. Baseline characteristics according to initiation of either fenofibrate or simvastatin among patients with pre-diabetes and diabetes**

| Variable list                                    | Fenofibrate<br>(n=7,236) | Simvastatin<br>(n=28,086) | Standard<br>difference |
|--------------------------------------------------|--------------------------|---------------------------|------------------------|
| <b>Demographics</b>                              |                          |                           |                        |
| Age, mean (SD), y                                | 62.2 (10.3)              | 62.0 (10.0)               | 0.015                  |
| Socioeconomic deprivation index score, mean (SD) | 2.3 (1.6)                | 2.3 (1.6)                 | 0.011                  |
| Women (%)                                        | 39.6                     | 39.6                      | 0.001                  |
| <b>BMI, mean (SD), kg/m<sup>2</sup></b>          | <b>31.0 (5.5)</b>        | <b>30.9 (5.8)</b>         | <b>0.010</b>           |
| <b>Lifestyle factors</b>                         |                          |                           |                        |
| Drinking (%)                                     |                          |                           | 0.047                  |
| None                                             | 22.8                     | 22.7                      |                        |
| Past                                             | 3.9                      | 3.7                       |                        |
| Current                                          | 65.8                     | 64.7                      |                        |
| Missing data                                     | 7.6                      | 8.8                       |                        |
| Smoking (%)                                      |                          |                           | 0.054                  |
| None                                             | 44.0                     | 45.0                      |                        |
| Past                                             | 35.5                     | 34.0                      |                        |
| Current                                          | 18.7                     | 18.6                      |                        |
| Missing data                                     | 1.8                      | 2.5                       |                        |
| <b>Comorbidity (%)</b>                           |                          |                           |                        |
| Hypercholesteremia*                              | 53.1                     | 55.6                      | 0.050                  |
| Hypertriglyceridemia*                            | 52.8                     | 50.1                      | 0.051                  |
| Hypertension                                     | 65.1                     | 62.1                      | 0.062                  |
| Transient ischemic attack                        | 3.6                      | 3.7                       | 0.001                  |
| Ischemic heart disease                           | 24.9                     | 23.9                      | 0.021                  |
| Myocardial infarction                            | 10.3                     | 10.2                      | 0.005                  |
| Stroke                                           | 4.3                      | 4.0                       | 0.019                  |
| Osteoarthritis                                   | 22.6                     | 21.3                      | 0.031                  |
| Chronic kidney disease                           | 10.2                     | 8.3                       | 0.066                  |
| Depression                                       | 15.1                     | 14.3                      | 0.023                  |
| Varicose veins                                   | 6.4                      | 6.0                       | 0.014                  |
| Venous thromboembolism                           | 3.9                      | 3.7                       | 0.011                  |
| Chronic obstructive pulmonary disease            | 4.5                      | 4.2                       | 0.016                  |
| Pneumonia or infection                           | 7.0                      | 7.3                       | 0.013                  |
| Osteoporosis                                     | 2.8                      | 2.8                       | 0.004                  |
| Fall                                             | 8.5                      | 7.8                       | 0.027                  |
| Cancer                                           | 8.6                      | 8.7                       | 0.002                  |
| <b>Medication‡ (%)</b>                           |                          |                           |                        |
| Nonsteroidal anti-inflammatory drugs             | 38.3                     | 36.3                      | 0.042                  |
| Opioids                                          | 14.7                     | 13.2                      | 0.042                  |
| Other statins                                    | 32.3                     | 29.8                      | 0.057                  |
| Corticosteroid                                   | 20.6                     | 19.8                      | 0.019                  |
| Thiazide diuretics                               | 23.2                     | 22.0                      | 0.029                  |
| Antihypertensive                                 | 77.3                     | 73.5                      | 0.089                  |
| Antidiabetic                                     | 62.3                     | 60.2                      | 0.044                  |
| Anticoagulants                                   | 4.7                      | 4.3                       | 0.018                  |

|                                          |           |           |       |
|------------------------------------------|-----------|-----------|-------|
| Aspirin                                  | 43.7      | 40.5      | 0.063 |
| Antidepressant                           | 15.8      | 15.2      | 0.016 |
| Proton pump inhibitors                   | 33.6      | 31        | 0.055 |
| Benzodiazepine                           | 12.6      | 11.5      | 0.034 |
| Warfarin                                 | 4.4       | 4.1       | 0.014 |
| Antiosteoporosis drugs                   | 6.2       | 6.5       | 0.011 |
| Nitrates                                 | 10.8      | 10.4      | 0.016 |
| Bisphosphonates                          | 2.7       | 2.5       | 0.013 |
| <b>Healthcare utilization, mean (SD)</b> |           |           |       |
| Hospitalizations‡                        | 0.4 (1.0) | 0.3 (1.0) | 0.030 |
| General practice visits‡                 | 6.6 (6.3) | 6.4 (6.6) | 0.032 |
| Specialist referrals‡                    | 0.6 (1.1) | 0.6 (1.1) | 0.040 |

†The Socio-Economic Deprivation Index was measured by the Townsend Deprivation Index, which was grouped into quintiles from 1 (least deprived) to 5 (most deprived).

‡Frequency during the past 1 year.

\*Hypercholesteremia was defined as a total cholesterol level above 5.0 mmol/L;

hypertriglyceridemia was defined as a non-fasting triglyceride level above 2.3 mmol/L.

BMI, body mass index; n, number; y, years; SD, standard deviation.

**Table S3. Baseline characteristics according to initiation of either fenofibrate or simvastatin among patients with pre-diabetes and diabetes<sup>#</sup>**

| Variable list                                    | Fenofibrate<br>(n=6,749) | Simvastatin<br>(n=25,923) | Standard<br>difference |
|--------------------------------------------------|--------------------------|---------------------------|------------------------|
| <b>Demographics</b>                              |                          |                           |                        |
| Age, mean (SD), y                                | 62.0 (10.2)              | 61.9 (10.0)               | 0.011                  |
| Socioeconomic deprivation index score, mean (SD) | 2.3 (1.6)                | 2.3 (1.6)                 | 0.014                  |
| Women (%)                                        | 39.1                     | 39.0                      | 0.002                  |
| <b>BMI, mean (SD), kg/m<sup>2</sup></b>          | <b>31.0 (5.5)</b>        | <b>30.9 (5.9)</b>         | <b>0.010</b>           |
| <b>Lifestyle factors</b>                         |                          |                           |                        |
| Drinking (%)                                     |                          |                           | 0.054                  |
| None                                             | 22.7                     | 23.0                      |                        |
| Past                                             | 3.8                      | 3.6                       |                        |
| Current                                          | 65.8                     | 64.3                      |                        |
| Missing data                                     | 7.7                      | 9.1                       |                        |
| Smoking (%)                                      |                          |                           | 0.057                  |
| None                                             | 43.9                     | 45.0                      |                        |
| Past                                             | 35.5                     | 34.3                      |                        |
| Current                                          | 18.9                     | 18.3                      |                        |
| Missing data                                     | 1.8                      | 2.5                       |                        |
| <b>Comorbidity (%)</b>                           |                          |                           |                        |
| Hypercholesteremia*                              | 52.9                     | 55.2                      | 0.045                  |
| Hypertriglyceridemia*                            | 52.8                     | 49.7                      | 0.062                  |
| Hypertension                                     | 65.1                     | 61.6                      | 0.072                  |
| Transient ischemic attack                        | 3.6                      | 3.6                       | 0.003                  |
| Ischemic heart disease                           | 24.6                     | 23.8                      | 0.018                  |
| Myocardial infarction                            | 10.1                     | 10.0                      | 0.005                  |
| Stroke                                           | 4.2                      | 4.2                       | 0.003                  |
| Osteoarthritis                                   | 21.8                     | 20.7                      | 0.028                  |
| Chronic kidney disease                           | 9.9                      | 8.2                       | 0.061                  |
| Depression                                       | 15.0                     | 13.8                      | 0.034                  |
| Varicose veins                                   | 6.1                      | 5.8                       | 0.014                  |
| Venous thromboembolism                           | 3.8                      | 3.5                       | 0.014                  |
| Chronic obstructive pulmonary disease            | 4.4                      | 4.2                       | 0.011                  |
| Pneumonia or infection                           | 6.8                      | 6.9                       | 0.004                  |
| Osteoporosis                                     | 2.3                      | 2.3                       | 0.003                  |
| Fall                                             | 7.8                      | 7.3                       | 0.020                  |
| Cancer                                           | 8.6                      | 8.4                       | 0.009                  |
| <b>Medication‡ (%)</b>                           |                          |                           |                        |
| Nonsteroidal anti-inflammatory drugs             | 37.9                     | 35.8                      | 0.044                  |
| Opioids                                          | 14.3                     | 13.1                      | 0.036                  |
| Other statins                                    | 32.4                     | 29.9                      | 0.054                  |
| Corticosteroid                                   | 20.3                     | 19.8                      | 0.013                  |
| Thiazide diuretics                               | 23.5                     | 22.5                      | 0.024                  |
| Antihypertensive                                 | 77.4                     | 73.6                      | 0.088                  |
| Antidiabetic                                     | 62.5                     | 60.1                      | 0.050                  |
| Anticoagulants                                   | 4.6                      | 4.3                       | 0.017                  |

|                                          |           |           |       |
|------------------------------------------|-----------|-----------|-------|
| Aspirin                                  | 43.7      | 40.3      | 0.069 |
| Antidepressant                           | 15.6      | 14.9      | 0.018 |
| Proton pump inhibitors                   | 33.0      | 30.8      | 0.048 |
| Benzodiazepine                           | 12.3      | 11.6      | 0.022 |
| Warfarin                                 | 4.3       | 4.0       | 0.015 |
| Antiosteoporosis drugs                   | 5.9       | 6.5       | 0.024 |
| Nitrates                                 | 10.7      | 10.2      | 0.014 |
| Bisphosphonates                          | 2.4       | 2.1       | 0.015 |
| <b>Healthcare utilization, mean (SD)</b> |           |           |       |
| Hospitalizations‡                        | 0.4 (1.0) | 0.3 (1.0) | 0.030 |
| General practice visits‡                 | 6.5 (6.3) | 6.3 (6.9) | 0.027 |
| Specialist referrals‡                    | 0.6 (1.1) | 0.5 (1.1) | 0.049 |

# Patients with a history of major osteoporotic fracture were excluded.

†The Socio-Economic Deprivation Index was measured by the Townsend Deprivation Index, which was grouped into quintiles from 1 (least deprived) to 5 (most deprived).

‡Frequency during the past 1 year.

\*Hypercholesteremia was defined as a total cholesterol level above 5.0 mmol/L;

hypertriglyceridemia was defined as a non-fasting triglyceride level above 2.3 mmol/L.

BMI, body mass index; n, number; y, years; SD, standard deviation.

**Table S4. Baseline characteristics according to initiation of either fenofibrate or simvastatin among patients with pre-diabetes and diabetes<sup>#</sup>**

| Variable list                                    | Fenofibrate<br>(n=7,201) | Simvastatin<br>(n=27,924) | Standard<br>difference |
|--------------------------------------------------|--------------------------|---------------------------|------------------------|
| <b>Demographics</b>                              |                          |                           |                        |
| Age, mean (SD), y                                | 62.1 (10.2)              | 61.9 (10.0)               | 0.015                  |
| Socioeconomic deprivation index score, mean (SD) | 2.3 (1.6)                | 2.3 (1.6)                 | 0.019                  |
| Women (%)                                        | 39.5                     | 39.5                      | <0.001                 |
| <b>BMI, mean (SD), kg/m<sup>2</sup></b>          | <b>31.0 (5.5)</b>        | <b>31.0 (5.9)</b>         | <b>0.003</b>           |
| <b>Lifestyle factors</b>                         |                          |                           |                        |
| Drinking (%)                                     |                          |                           | 0.049                  |
| None                                             | 22.7                     | 22.8                      |                        |
| Past                                             | 3.9                      | 3.5                       |                        |
| Current                                          | 65.8                     | 64.9                      |                        |
| Missing data                                     | 7.5                      | 8.8                       |                        |
| Smoking (%)                                      |                          |                           | 0.056                  |
| None                                             | 43.9                     | 45.3                      |                        |
| Past                                             | 35.6                     | 34.0                      |                        |
| Current                                          | 18.8                     | 18.4                      |                        |
| Missing data                                     | 1.8                      | 2.4                       |                        |
| <b>Comorbidity (%)</b>                           |                          |                           |                        |
| Hypercholesteremia*                              | 53.2                     | 55.5                      | 0.046                  |
| Hypertriglyceridemia*                            | 53.0                     | 50.4                      | 0.052                  |
| Hypertension                                     | 65.0                     | 62.0                      | 0.062                  |
| Transient ischemic attack                        | 3.6                      | 3.7                       | 0.002                  |
| Ischemic heart disease                           | 24.8                     | 23.6                      | 0.029                  |
| Myocardial infarction                            | 10.4                     | 9.8                       | 0.018                  |
| Stroke                                           | 4.3                      | 4.0                       | 0.015                  |
| Osteoarthritis                                   | 22.6                     | 21.4                      | 0.028                  |
| Chronic kidney disease                           | 10.2                     | 8.2                       | 0.066                  |
| Depression                                       | 15.1                     | 14.1                      | 0.027                  |
| Varicose veins                                   | 6.3                      | 6.2                       | 0.008                  |
| Venous thromboembolism                           | 3.9                      | 3.7                       | 0.014                  |
| Chronic obstructive pulmonary disease            | 4.5                      | 4.0                       | 0.027                  |
| Pneumonia or infection                           | 7.0                      | 7.0                       | 0.001                  |
| Osteoporosis                                     | 2.8                      | 2.8                       | 0.003                  |
| Fall                                             | 8.6                      | 7.6                       | 0.036                  |
| Cancer                                           | 8.6                      | 8.7                       | 0.004                  |
| <b>Medication‡ (%)</b>                           |                          |                           |                        |
| Nonsteroidal anti-inflammatory drugs             | 38.2                     | 36.4                      | 0.038                  |
| Opioids                                          | 14.8                     | 13.3                      | 0.043                  |
| Other statins                                    | 33.3                     | 29.7                      | 0.077                  |
| Corticosteroid                                   | 20.6                     | 19.8                      | 0.019                  |
| Thiazide diuretics                               | 23.2                     | 22.5                      | 0.017                  |
| Antihypertensive                                 | 77.3                     | 73.5                      | 0.089                  |
| Antidiabetic                                     | 62.3                     | 60.3                      | 0.040                  |
| Anticoagulants                                   | 4.7                      | 4.1                       | 0.028                  |

|                                          |           |           |       |
|------------------------------------------|-----------|-----------|-------|
| Aspirin                                  | 43.7      | 40.2      | 0.071 |
| Antidepressant                           | 15.7      | 15.0      | 0.019 |
| Proton pump inhibitors                   | 33.6      | 31.1      | 0.053 |
| Benzodiazepine                           | 12.5      | 11.7      | 0.024 |
| Warfarin                                 | 4.3       | 3.8       | 0.027 |
| Antiosteoporosis drugs                   | 6.2       | 6.6       | 0.017 |
| Nitrates                                 | 10.8      | 10.2      | 0.019 |
| Bisphosphonates                          | 2.7       | 2.3       | 0.021 |
| <b>Healthcare utilization, mean (SD)</b> |           |           |       |
| Hospitalizations‡                        | 0.4 (1.0) | 0.3 (1.0) | 0.046 |
| General practice visits‡                 | 6.6 (6.3) | 6.4 (7.2) | 0.026 |
| Specialist referrals‡                    | 0.6 (1.1) | 0.5 (1.1) | 0.049 |

# Patients with a history of dementia were excluded.

†The Socio-Economic Deprivation Index was measured by the Townsend Deprivation Index, which was grouped into quintiles from 1 (least deprived) to 5 (most deprived).

‡Frequency during the past 1 year.

\*Hypercholesteremia was defined as a total cholesterol level above 5.0 mmol/L;

hypertriglyceridemia was defined as a non-fasting triglyceride level above 2.3 mmol/L.

BMI, body mass index; n, number; y, years; SD, standard deviation.

**Table S5. Life expectancy between patients treated with fenofibrate and simvastatin at different ages**

| Age interval, y | Simvastatin, y (95% CI) | Fenofibrate, y (95% CI) | Difference in LE, y (95% CI)* |
|-----------------|-------------------------|-------------------------|-------------------------------|
| 40-44           | 35.52 (35.43 to 35.62)  | 36.22 (36.05 to 36.40)  | -0.70 (-0.90 to -0.50)        |
| 45-49           | 31.21 (31.12 to 31.29)  | 31.49 (31.31 to 31.66)  | -0.28 (-0.48 to -0.09)        |
| 50-54           | 27.23 (27.15 to 27.32)  | 27.35 (27.18 to 27.52)  | -0.12 (-0.31 to -0.07)        |
| 55-59           | 23.49 (23.41 to 23.57)  | 23.70 (23.54 to 23.87)  | -0.21 (-0.40 to -0.03)        |
| 60-64           | 20.11 (20.03 to 20.19)  | 20.28 (20.11 to 20.44)  | -0.17 (-0.35 to -0.02)        |
| 65-69           | 16.94 (16.86 to 17.02)  | 17.48 (17.30 to 17.66)  | -0.54 (-0.74 to -0.35)        |
| 70-74           | 14.12 (14.03 to 14.21)  | 15.24 (15.05 to 15.44)  | -1.12 (-1.33 to -0.91)        |
| 75-79           | 11.80 (11.70 to 11.90)  | 13.25 (13.04 to 13.47)  | -1.45 (-1.69 to -1.22)        |
| 80-84           | 9.85 (9.74 to 9.96)     | 11.66 (11.43 to 11.89)  | -1.81 (-2.07 to -1.56)        |
| ≥85             | 8.63 (8.33 to 8.83)     | 11.34 (11.14 to 11.44)  | -2.71 (-3.14 to -2.01)        |

Y, year; 95% CI, 95% confidence interval; LE, life expectancy.

\* The difference in life expectancy was calculated as the estimated life expectancy in patients treated with simvastatin minus that in patients treated with fenofibrate.

**Table S6. KEY RESOURCES TABLE**

| <b>REAGENT or RESOURCE</b>                           | <b>SOURCE</b>                  | <b>IDENTIFIER</b>               |
|------------------------------------------------------|--------------------------------|---------------------------------|
| <b>Antibodies</b>                                    |                                |                                 |
| Mouse monoclonal anti-p- $\gamma$ H2AX               | Santa Cruz                     | CAT#sc-517348; RRID: AB_2783871 |
| Mouse monoclonal anti-p21                            | Santa Cruz                     | CAT#sc-6246; RRID: AB_628073    |
| Mouse monoclonal anti-p53                            | Cell signaling<br>Technology   | CAT#2524s; RRID: AB_331743      |
| Rabbit monoclonal anti-p-IR                          | Cell signaling<br>Technology   | CAT#3024s; RRID: AB_331253      |
| Rabbit monoclonal anti-IR                            | Cell signaling<br>Technology   | CAT#3025s; RRID: AB_2280448     |
| Rabbit polyclonal anti-p-AKT                         | Cell signaling<br>Technology   | CAT#9271s; RRID: AB_329825      |
| Rabbit polyclonal anti-AKT                           | Cell signaling<br>Technology   | CAT#9272s; RRID: AB_329827      |
| Rabbit polyclonal anti-p-GSK3 $\beta$                | Cell signaling<br>Technology   | CAT#9336s; RRID: AB_331405      |
| Rabbit monoclonal anti-GSK3 $\beta$                  | Cell signaling<br>Technology   | CAT#9315s; RRID: AB_490890      |
| Mouse monoclonal anti-PPAR $\alpha$                  | Santa Cruz                     | CAT#sc-398394; RRID: AB_2885073 |
| Mouse monoclonal anti-PSD95                          | Santa Cruz                     | CAT#sc-32290; RRID: AB_628114   |
| Mouse monoclonal anti-GluR-1                         | Santa Cruz                     | CAT#sc-55509; RRID: AB_629532   |
| Rabbit polyclonal anti-IBA1                          | Proteintech                    | CAT#10904-1-AP; RRID:AB_2224377 |
| Rat monoclonal anti-F4/80                            | Abcam                          | CAT#ab6640; RRID:AB_1140040     |
| Mouse monoclonal anti-Osteocalcin                    | Takara                         | CAT#M188; RRID: AB_2935810      |
| <b>Chemicals, Peptides, and Recombinant Proteins</b> |                                |                                 |
| Recombinant human M-CSF protein                      | Proteintech                    | CAT#HZ-1192                     |
| Dasatinib                                            | LC labs                        | CAT#D-3307                      |
| Quercetin                                            | Sigma-Aldrich                  | CAT# Q4951                      |
| Fenofibrate                                          | Sigma-Aldrich                  | CAT#F6020                       |
| Percoll                                              | GE Healthcare Life<br>Sciences | CAT# 17-0891-01                 |
| PKH26                                                | Sigma-Aldrich                  | CAT# PKH26GL-1KT                |
| Protease Inhibitor Cocktail                          | Selleck                        | CAT#B14001                      |
| Phosphatase Inhibitor Cocktail                       | Selleck                        | CAT#B15001                      |



|                                                                                                |                           |        |                  |
|------------------------------------------------------------------------------------------------|---------------------------|--------|------------------|
| Protein Ladder                                                                                 | Thermo Scientific         | Fisher | CAT#26617        |
| insulin                                                                                        | Novo Nordisk              |        | J20160057        |
| <b>Critical commercial assays</b>                                                              |                           |        |                  |
| Senescence $\beta$ -Gal Staining Kit                                                           | Solarbio                  |        | CAT#G1580        |
| ExoQuick™-TC reagent                                                                           | SBI                       |        | CAT#EXOTC10A-1   |
| Evo M-MLV RT Master Mix                                                                        | Accurate Biology          |        | CAT#AG11706      |
| All-in-One miRNA qPCR Kit                                                                      | GeneCopoeia               |        | CAT#QP010        |
| BCA protein assay kits                                                                         | Thermo Scientific         | Fisher | CAT# 23227       |
| Triglyceride (TG) kit                                                                          | Elabscience               |        | CAT# E-BC-K261-M |
| Glucometer monitor                                                                             | Roche                     |        | ACCU-CHEK Active |
| <b>Experimental Models: Cell Lines</b>                                                         |                           |        |                  |
| Bone marrow-derived macrophage                                                                 | This paper                |        | N/A              |
| Primary hepatocyte                                                                             | This paper                |        | N/A              |
| Bone marrow mesenchymal stem cell                                                              | This paper                |        | N/A              |
| <b>Experimental models: Organisms/strains</b>                                                  |                           |        |                  |
| Mouse: C57BL/6J                                                                                | SLAC Laboratory           |        | N/A              |
| Mouse: miR-378a floxed mice                                                                    | GemPharmatech CO., Ltd    |        | T007903          |
| <b>Oligonucleotides</b>                                                                        |                           |        |                  |
| PCR primer for genotype: miR-378a-floxed<br>5'arm-forward: CAC TTG CTG CCG TAC<br>TTT CAC G    | GemPharmatech<br>CO., Ltd |        | T007903          |
| PCR primer for genotype: miR-378a-floxed<br>5'arm- reverse: CCA ACT GAC CTT GGG<br>CAA GAA CAT | GemPharmatech<br>CO., Ltd |        | T007903          |
| PCR primer for genotype: miR-378a-floxed<br>3'arm-forward: TAC TCT TGC CGT TCA<br>TGT GCG      | GemPharmatech<br>CO., Ltd |        | T007903          |
| PCR primer for genotype: miR-378a-floxed<br>3'arm- reverse: AAG ATG GCT CCT ACC<br>AAA GGT AGC | GemPharmatech<br>CO., Ltd |        | T007903          |
| RT-PCR primer: Mki67 Forward:<br>5'-AATCCAACCTCAAGTAAACGGGG-3'                                 | This paper                |        | N/A              |
| RT-PCR primer: Mki67 Reverse:<br>5'-TTGGCTTGCTTCCATCCTCA-3'                                    | This paper                |        | N/A              |
| RT-PCR primer: Cdkn1a Forward:<br>5'-CCTGGTGATGTCCGACCTG-3'                                    | This paper                |        | N/A              |

|                                                                        |            |     |
|------------------------------------------------------------------------|------------|-----|
| RT-PCR primer: Cdkn1a Reverse:<br>5'-CCATGAGCGCATCGCAATC-3'            | This paper | N/A |
| RT-PCR primer: Cdkn2a Forward:<br>5'-ACATCAAGACATCGTGCGATATT-3'        | This paper | N/A |
| RT-PCR primer: Cdkn2a Reverse:<br>5'-CCAGCGGTACACAAAGACCA-3'           | This paper | N/A |
| RT-PCR primer: IL-1 $\beta$ Forward:<br>5'-GCAACTGTTCTGAACTCAACT-3'    | This paper | N/A |
| RT-PCR primer: IL-1 $\beta$ Reverse:<br>5'-ATCTTTTGGGGTCCGTCAACT-3'    | This paper | N/A |
| RT-PCR primer: IL-6 Forward:<br>5'-TAGTCCTTCTACCCCAATTCC-3'            | This paper | N/A |
| RT-PCR primer: IL-6 Reverse:<br>5'-TTGGTCCTTAGCCACTCCTTC-3'            | This paper | N/A |
| RT-PCR primer: TNF- $\alpha$ Forward:<br>5'-CCCTCACACTCAGATCATCTTCT-3' | This paper | N/A |
| RT-PCR primer: TNF- $\alpha$ Reverse:<br>5'-GCTACGACGTGGGCTACAG-3'     | This paper | N/A |
| RT-PCR primer: Cxcl1 Forward:<br>5'-CTGGGATTCACCTCAAGAACATC-3'         | This paper | N/A |
| RT-PCR primer: Cxcl1 Reverse:<br>5'-CAGGGTCAAGGCAAGCCTC-3'             | This paper | N/A |
| RT-PCR primer: Cxcl10 Forward:<br>5'-CCAAGTGCTGCCGTCATTTTC-3'          | This paper | N/A |
| RT-PCR primer: Cxcl10 Reverse:<br>5'-GGCTCGCAGGGATGATTTCAA-3'          | This paper | N/A |
| RT-PCR primer: MMP10 Forward:<br>5'-GAGCCACTAGCCATCCTGG-3'             | This paper | N/A |
| RT-PCR primer: MMP10 Reverse:<br>5'-CTGAGCAAGATCCATGCTTGG-3'           | This paper | N/A |
| RT-PCR primer: MMP13 Forward:<br>5'-CTTCTTCTGTTGAGCTGGACTC-3'          | This paper | N/A |
| RT-PCR primer: MMP13 Reverse:<br>5'-CTGTGGAGGTCAGTACTGACT-3'           | This paper | N/A |

### Software and algorithms

|                                            |                |                                                                                                                               |
|--------------------------------------------|----------------|-------------------------------------------------------------------------------------------------------------------------------|
| Data-analysis software                     | Bruker MicroCT | Version 1.9                                                                                                                   |
| 3-dimensional model visualization software | Bruker MicroCT | Version 2.0                                                                                                                   |
| NRecon image reconstruction software       | Bruker MicroCT | Version 1.6                                                                                                                   |
| Prism 8                                    | Graphpad       | <a href="http://www.graphpad.com/">http://www.graphpad.com/</a>                                                               |
| Image Lab                                  | BioRad         | <a href="http://www.bio-rad.com/en-us/product/image-lab-software">http://www.bio-rad.com/en-us/product/image-lab-software</a> |

ChemiDoc XRS imaging system

BioRad

[http://www.bio-rad.com/en-us/  
product/chemidoc-imaging-systems/chemidoc-xrs-system](http://www.bio-rad.com/en-us/product/chemidoc-imaging-systems/chemidoc-xrs-system)

---
